# Supplementary material for: Epidemiological investigation and genetic evolutionary analysis of PRRSV-1 on a pig farm in China
Source: Front Microbiol. 2022 Dec 1;13:1067173. doi: 10.3389/fmicb.2022.1067173 (PMC9751794; doi:10.3389/fmicb.2022.1067173)
Supplement: Supplementary file 2 [file Table_2.XLSX]

## Sheet: Sheet1
TABLE S1. Sample Details
				PRRSVa
	No.	Sample sourceb	Sample serial number	P/Nc	NSP2	ORF5	ORF7	complete sequence
0-15d (2020.05.01-2020.05.15)	1	Lung and submandibular lymph nodes	TZJ211	Negative				\d
	2	Lung and submandibular lymph nodes	TZJ212	Negative				\
	3	serum	TZJ213	Negative				\	PRRSVa: porcine reproductive and respiratory syndrome virus
	4	Lung and submandibular lymph nodes	TZJ214	Negative				\
	5	serum	TZJ215	Negative				\	Sample sourceb:mix and grind the collected lungs and submandibular lymph nodes, centrifugation of blood to collect serum
	6	serum	TZJ216	Negative				\
	7	serum	TZJ219	Negative				\	P/Nc: Positive or Negative
	8	serum	TZJ220	Positive	\	\	L8.7 (HP-PRRSV-like)	\
	9	Lung and submandibular lymph nodes	TZJ221	Negative				\	\d :sequence not detected
	10	serum	TZJ222	Negative				\
	11	serum	TZJ223	Negative				\
	12	serum	TZJ224	Negative				\
	13	Lung and submandibular lymph nodes	TZJ225	Negative				\
	14	serum	TZJ226	Positive	PRRSV-1	PRRSV-1	PRRSV-1	PRRSV-1
	15	serum	TZJ227	Positive	\	PRRSV-1	PRRSV-1	\
16-30d (2020.05.16-2020.05.30)	16	serum	TZJ228	Negative				\
	17	serum	TZJ229	Negative				\
	18	serum	TZJ230	Negative				\
	19	serum	TZJ231	Negative				\
	20	serum	TZJ232	Negative				\
	21	Lung and submandibular lymph nodes	TZJ233	Negative				\
	22	serum	TZJ234	Positive	\	PRRSV-1	PRRSV-1	\
	23	serum	TZJ235	Negative				\
	24	Lung and submandibular lymph nodes	TZJ236	Negative				\
	25	Lung and submandibular lymph nodes	TZJ237	Negative				\
	26	serum	TZJ238	Negative				\
	27	serum	TZJ239	Negative				\
	28	serum	TZJ240	Negative				\
31-45d (2020.05.31-2020.06.14)	29	Lung and submandibular lymph nodes	TZJ241	Negative				\
	30	serum	TZJ242	Positive	\	L8.7 (HP-PRRSV-like)	\	\
	31	serum	TZJ609	Positive	\	PRRSV-1	PRRSV-1	\
	32	serum	TZJ610	Negative				\
	33	serum	TZJ611	Negative				\
	34	serum	TZJ612	Positive	\	\	L1.8 (NADC30-like PRRSV)	\
	35	Lung and submandibular lymph nodes	TZJ613	Positive	\	PRRSV-1	PRRSV-1	\
	36	serum	TZJ614	Negative				\
	37	serum	TZJ615	Negative				\
	38	serum	TZJ616	Negative				\
	39	serum	TZJ617	Negative				\
	40	serum	TZJ618	Negative				\
46-60d (2020.06.15-2020.06.29)	41	serum	TZJ619	Negative				\
	42	Lung and submandibular lymph nodes	TZJ620	Positive	L1.8 (NADC30-like PRRSV)	ATCC-VR2332	\	\
	43	serum	TZJ621	Negative				\
	44	Lung and submandibular lymph nodes	TZJ622	Positive	\	PRRSV-1	PRRSV-1	\
	45	serum	TZJ623	Positive	\	L8.7 (HP-PRRSV-like)	\	\
	46	serum	TZJ624	Positive	\	PRRSV-1	PRRSV-1	\
	47	serum	TZJ625	Negative				\
	48	serum	TZJ626	Negative				\
	49	serum	TZJ627	Negative				\
	50	serum	TZJ628	Negative				\
	51	serum	TZJ629	Negative				\
61-75d (2020.06.30-2020.07-14)	52	serum	TZJ630	Negative				\
	53	Lung and submandibular lymph nodes	TZJ631	Negative				\
	54	serum	TZJ632	Negative				\
	55	serum	TZJ633	Negative				\
	56	serum	TZJ634	Negative				\
	57	serum	TZJ635	Negative				\
	58	serum	TZJ636	Positive	\	L1.8 (NADC30-like PRRSV)	L1.8 (NADC30-like PRRSV)	\
	59	Lung and submandibular lymph nodes	TZJ637	Positive	PRRSV-1	PRRSV-1	PRRSV-1	PRRSV-1
	60	serum	TZJ638	Negative				\
	61	serum	TZJ639	Negative				\
	62	serum	TZJ640	Negative				\
	63	Lung and submandibular lymph nodes	TZJ641	Positive	\	\	PRRSV-1	\
	64	serum	TZJ642	Positive	\	PRRSV-1	PRRSV-1	\
76-90d (2020.07.15-2020.07.29)	65	serum	TZJ643	Negative				\
	66	serum	TZJ644	Negative				\
	67	serum	TZJ645	Negative				\
	68	serum	TZJ646	Negative				\
	69	serum	TZJ647	Negative				\
	70	serum	TZJ648	Negative				\
	71	serum	TZJ649	Negative				\
	72	serum	TZJ650	Negative				\
	73	serum	TZJ651	Negative				\
	74	serum	TZJ652	Negative				\
	75	serum	TZJ653	Negative				\
	76	serum	TZJ654	Negative				\
91-105d (2020.07.30-2020.08.13)	77	serum	TZJ655	Negative				\
	78	serum	TZJ656	Negative				\
	79	Lung and submandibular lymph nodes	TZJ657	Positive	\	PRRSV-1	PRRSV-1	\
	80	serum	TZJ658	Positive	\	\	L1.8 (NADC30-like PRRSV)	\
	81	serum	TZJ659	Positive	\	PRRSV-1	PRRSV-1	\
	82	Lung and submandibular lymph nodes	TZJ660	Positive	\	PRRSV-1	PRRSV-1	\
	83	serum	TZJ661	Positive	\	\	L1.8 (NADC30-like PRRSV)	\
	84	serum	TZJ662	Negative				\
	85	serum	TZJ663	Positive	\	\	L1.8 (NADC30-like PRRSV)	\
	86	serum	TZJ664	Positive	\	\	L1.8 (NADC30-like PRRSV)	\
	87	serum	TZJ665	Negative				\
	88	serum	TZJ666	Negative				\
	89	serum	TZJ667	Negative				\
	90	serum	TZJ668	Negative				\
	91	serum	TZJ669	Positive	\	\	L1.8 (NADC30-like PRRSV)	\
	92	serum	TZJ670	Positive	\	\	L1.8 (NADC30-like PRRSV)	\
	93	serum	TZJ671	Negative				\
106-120d (2020.08.14-2020.08.28)	94	serum	TZJ672	Positive	\	\	L1.8 (NADC30-like PRRSV)	\
	95	serum	TZJ673	Negative				\
	96	serum	TZJ674	Negative				\
	97	serum	TZJ675	Positive	\	\	PRRSV-1	\
	98	serum	TZJ676	Negative				\
	99	serum	TZJ677	Negative				\
	100	serum	TZJ678	Negative				\
	101	serum	TZJ679	Positive	L8.7 (HP-PRRSV-like)	L8.7 (HP-PRRSV-like)	\	\
	102	Lung and submandibular lymph nodes	TZJ680	Positive	L8.7 (HP-PRRSV-like)	L8.7 (HP-PRRSV-like)	\	\
	103	serum	TZJ681	Positive	L8.7 (HP-PRRSV-like)	L8.7 (HP-PRRSV-like)	\	\
	104	serum	TZJ682	Negative				\
	105	serum	TZJ683	Positive	L8.7 (HP-PRRSV-like)	L8.7 (HP-PRRSV-like)	\	\
	106	Lung and submandibular lymph nodes	TZJ684	Positive	L8.7 (HP-PRRSV-like)	L8.7 (HP-PRRSV-like)	\	\
	107	serum	TZJ685	Positive	L8.7 (HP-PRRSV-like)	L8.7 (HP-PRRSV-like)	\	\
121-135d (2020.08.29-2020.09.12)	108	serum	TZJ686	Positive	L8.7 (HP-PRRSV-like)	L8.7 (HP-PRRSV-like)	\	\
	109	serum	TZJ687	Positive	L8.7 (HP-PRRSV-like)	L8.7 (HP-PRRSV-like)	\	\
	110	serum	TZJ688	Negative		L8.7 (HP-PRRSV-like)	\	\
	111	serum	TZJ689	Negative				\
	112	Lung and submandibular lymph nodes	TZJ690	Positive	L8.7 (HP-PRRSV-like)	L8.7 (HP-PRRSV-like)	\	\
	113	serum	TZJ691	Negative				\
	114	serum	TZJ692	Positive	L8.7 (HP-PRRSV-like)	L8.7 (HP-PRRSV-like)	\	\
	115	serum	TZJ693	Negative				\
	116	serum	TZJ694	Negative				\
	117	serum	TZJ695	Negative				\
	118	serum	TZJ696	Negative				\
	119	serum	TZJ702	Negative				\
	120	serum	TZJ703	Negative				\
	121	serum	TZJ704	Negative				\
	122	serum	TZJ705	Negative				\
136-150d (2020.09.13-2020.09.27)	123	serum	TZJ706	Negative				\
	124	serum	TZJ707	Negative				\
	125	serum	TZJ708	Negative				\
	126	serum	TZJ709	Negative				\
	127	serum	TZJ710	Negative				\
	128	serum	TZJ711	Negative				\
	129	serum	TZJ718	Negative				\
	130	serum	TZJ719	Negative				\
	131	serum	TZJ720	Negative				\
	132	serum	TZJ721	Negative				\
