# Supplementary material for: Epidemiological investigation and genetic evolutionary analysis of PRRSV-1 on a pig farm in China
Source: Front Microbiol. 2022 Dec 1;13:1067173. doi: 10.3389/fmicb.2022.1067173 (PMC9751794; doi:10.3389/fmicb.2022.1067173)
Supplement: Supplementary file 6 [file Table_6.XLSX]

## Sheet: Sheet1
Table S5. The pairwise identitiesa (%) matrix of ORF5 of Chinese PRRSV-1
	EU076704.1_HKEU16	KF287131.1_HK10	KF287130.1_HK5	KF287129.1_HK3	KF287128.1_HK8	KF001144.1_GZ11-G1	GQ461593.1_SHE	MN242825.1_NPUST-2789-3W-2	MN265857.1_NPUST-2789-3W-5	MN265858.1_NPUST-2860-S-6	HM755885.1_FJ0602	HM114313.1_FJ0603	MF153487.1_GDGZ16	MF153496.1_GDSW16	MF153497.1_GDYF16	MF153498.1_GDYJ16	MF153490.1_GDJM16	MF153492.1_GDMM16	MF153494.1_GDQY16	MF153500.1_GDZQ16	MF153495.1_GDSG16	KT224385.1_HLJB1	AY633973.1_B13	MN550991.1_KZ2018	MK689121.1_HN1804-1	JX187609.1_NVDC-NM1-2011	KM196101.1_LNEU12	GU047344.1_BJEU06-1	KP860912.1_FJEU13	KX967492.1_15HEN1_EU	KY363382.1_HENZMD-10	TZJ642	TZJ609	TZJ613	TZJ659	TZJ660	TZJ227	TZJ657	TZJ637	TZJ622	TZJ226	TZJ624	TZJ234	GU047345.1_NMEU09-1	MF153486.1_GDFS16	MF153499.1_GDZJ16	MF153489.1_GDHZ16	MF153491.1_GDJY16	KP860913.1_FJQEU14
EU076704.1_HKEU16	-	99.67	97.36	97.19	92.41	88.28	89.27	89.44	89.27	89.27	88.78	89.11	87.46	87.46	87.46	87.46	87.62	87.79	87.29	87.46	86.96	89.44	89.44	83.33	84.98	85.31	84.49	83.99	84.65	84.49	82.18	83.99	83.99	83.99	83.99	83.99	84.49	84.49	84.98	84.98	84.82	84.82	84.98	83.66	83.5	83	83.17	83	81.52
KF287131.1_HK10	99.67	-	97.69	97.52	92.74	88.61	89.6	89.77	89.6	89.6	89.11	89.44	87.79	87.79	87.79	87.79	87.95	88.12	87.62	87.79	87.29	89.77	89.77	83.66	85.31	85.64	84.82	84.32	84.98	84.82	82.51	84.32	84.32	84.32	84.32	84.32	84.82	84.82	85.31	85.31	85.15	85.15	85.31	83.99	83.83	83.33	83.5	83.33	81.85
KF287130.1_HK5	97.36	97.69	-	97.85	92.57	89.11	90.1	90.26	90.1	90.1	89.77	90.1	88.28	88.28	88.28	88.28	88.45	88.28	88.12	88.28	87.79	89.93	90.26	83.17	84.82	85.48	84.65	84.65	84.49	84.82	82.67	84.49	84.49	84.49	84.49	84.49	84.98	84.98	85.15	85.15	84.98	84.98	85.15	85.31	83.83	83.66	84.16	83.99	83.17
KF287129.1_HK3	97.19	97.52	97.85	-	93.56	89.44	90.43	90.59	90.43	90.43	90.1	90.43	88.45	88.45	88.45	88.45	88.61	88.45	88.28	88.45	87.95	89.27	90.59	84.32	86.14	86.63	85.81	85.48	85.31	85.81	83.5	84.49	84.49	84.49	84.49	84.49	84.98	84.98	85.15	85.15	84.98	84.98	85.15	85.81	84.32	84.16	84.98	84.82	83.33
KF287128.1_HK8	92.41	92.74	92.57	93.56	-	89.93	90.1	90.59	90.43	90.43	89.93	90.26	88.45	88.45	88.45	88.45	88.61	88.45	88.28	88.45	87.95	88.61	90.43	84.16	86.96	86.3	86.14	85.64	84.98	86.3	84.49	85.48	85.48	85.48	85.48	85.48	85.31	85.31	85.81	85.81	85.64	85.64	85.48	85.15	85.48	84.98	85.31	85.15	83.33
KF001144.1_GZ11-G1	88.28	88.61	89.11	89.44	89.93	-	96.04	96.7	96.53	96.53	96.2	96.2	93.4	93.4	93.4	93.4	93.56	93.4	93.23	93.4	92.9	92.24	91.58	84.49	86.96	86.8	86.8	87.95	85.81	86.96	84.65	85.31	85.31	85.31	85.31	85.31	85.48	85.48	84.98	84.98	84.82	84.82	84.65	86.47	84.32	83.83	83.83	83.66	82.34
GQ461593.1_SHE	89.27	89.6	90.1	90.43	90.1	96.04	-	98.51	98.35	98.35	97.69	98.02	95.38	95.38	95.38	95.38	95.54	95.38	95.21	95.38	94.88	93.89	94.22	84.65	87.13	87.95	87.46	88.28	86.63	87.13	85.15	86.14	86.14	86.14	86.14	86.14	86.63	86.63	86.47	86.47	86.3	86.3	85.81	87.29	85.81	85.31	85.31	85.15	83.5
MN242825.1_NPUST-2789-3W-2	89.44	89.77	90.26	90.59	90.59	96.7	98.51	-	99.83	99.83	97.85	98.18	95.21	95.21	95.21	95.21	95.38	95.21	95.05	95.21	94.72	94.72	94.06	84.98	87.46	88.28	87.95	89.11	86.96	87.95	85.81	86.8	86.8	86.8	86.8	86.8	87.29	87.29	86.8	86.8	86.63	86.63	86.47	87.46	86.3	85.81	85.81	85.64	83.99
MN265857.1_NPUST-2789-3W-5	89.27	89.6	90.1	90.43	90.43	96.53	98.35	99.83	-	99.67	97.69	98.02	95.05	95.05	95.05	95.05	95.21	95.05	94.88	95.05	94.55	94.55	93.89	85.15	87.29	88.12	87.79	88.94	86.8	87.79	85.64	86.63	86.63	86.63	86.63	86.63	87.13	87.13	86.63	86.63	86.47	86.47	86.3	87.29	86.47	85.97	85.97	85.81	84.16
MN265858.1_NPUST-2860-S-6	89.27	89.6	90.1	90.43	90.43	96.53	98.35	99.83	99.67	-	97.69	98.02	95.05	95.05	95.05	95.05	95.21	95.05	94.88	95.05	94.55	94.55	93.89	84.82	87.29	88.12	87.79	88.94	86.8	87.79	85.64	86.63	86.63	86.63	86.63	86.63	87.13	87.13	86.63	86.63	86.47	86.47	86.3	87.62	86.47	85.97	85.97	85.81	84.16
HM755885.1_FJ0602	88.78	89.11	89.77	90.1	89.93	96.2	97.69	97.85	97.69	97.69	-	99.67	94.55	94.55	94.55	94.55	94.72	94.55	94.39	94.55	94.06	93.07	93.73	84.16	86.63	87.13	86.8	87.62	85.81	86.96	84.65	85.48	85.48	85.48	85.48	85.48	85.97	85.97	85.64	85.64	85.48	85.48	85.31	86.96	85.48	84.98	85.31	85.15	83.17
HM114313.1_FJ0603	89.11	89.44	90.1	90.43	90.26	96.2	98.02	98.18	98.02	98.02	99.67	-	94.55	94.55	94.55	94.55	94.72	94.55	94.39	94.55	94.06	93.4	94.06	84.16	86.63	87.46	86.96	87.95	86.14	86.96	84.98	85.81	85.81	85.81	85.81	85.81	86.3	86.3	85.97	85.97	85.81	85.81	85.64	86.96	85.81	85.31	85.31	85.15	83.5
MF153487.1_GDGZ16	87.46	87.79	88.28	88.45	88.45	93.4	95.38	95.21	95.05	95.05	94.55	94.55	-	100	100	100	99.83	99.67	99.5	99.67	99.17	92.24	91.25	83.99	86.47	87.95	87.62	87.46	85.15	86.96	85.48	86.14	86.14	86.14	86.14	86.14	86.63	86.63	86.47	86.47	86.3	86.3	86.47	86.47	84.82	84.32	84.65	84.49	82.67
MF153496.1_GDSW16	87.46	87.79	88.28	88.45	88.45	93.4	95.38	95.21	95.05	95.05	94.55	94.55	100	-	100	100	99.83	99.67	99.5	99.67	99.17	92.24	91.25	83.99	86.47	87.95	87.62	87.46	85.15	86.96	85.48	86.14	86.14	86.14	86.14	86.14	86.63	86.63	86.47	86.47	86.3	86.3	86.47	86.47	84.82	84.32	84.65	84.49	82.67
MF153497.1_GDYF16	87.46	87.79	88.28	88.45	88.45	93.4	95.38	95.21	95.05	95.05	94.55	94.55	100	100	-	100	99.83	99.67	99.5	99.67	99.17	92.24	91.25	83.99	86.47	87.95	87.62	87.46	85.15	86.96	85.48	86.14	86.14	86.14	86.14	86.14	86.63	86.63	86.47	86.47	86.3	86.3	86.47	86.47	84.82	84.32	84.65	84.49	82.67
MF153498.1_GDYJ16	87.46	87.79	88.28	88.45	88.45	93.4	95.38	95.21	95.05	95.05	94.55	94.55	100	100	100	-	99.83	99.67	99.5	99.67	99.17	92.24	91.25	83.99	86.47	87.95	87.62	87.46	85.15	86.96	85.48	86.14	86.14	86.14	86.14	86.14	86.63	86.63	86.47	86.47	86.3	86.3	86.47	86.47	84.82	84.32	84.65	84.49	82.67
MF153490.1_GDJM16	87.62	87.95	88.45	88.61	88.61	93.56	95.54	95.38	95.21	95.21	94.72	94.72	99.83	99.83	99.83	99.83	-	99.83	99.67	99.83	99.34	92.41	91.42	83.99	86.47	87.95	87.62	87.46	85.15	86.96	85.48	86.14	86.14	86.14	86.14	86.14	86.63	86.63	86.47	86.47	86.3	86.3	86.47	86.47	84.82	84.32	84.65	84.49	82.67
MF153492.1_GDMM16	87.79	88.12	88.28	88.45	88.45	93.4	95.38	95.21	95.05	95.05	94.55	94.55	99.67	99.67	99.67	99.67	99.83	-	99.5	99.67	99.17	92.24	91.25	83.83	86.3	88.12	87.79	87.62	85.15	86.96	85.64	85.97	85.97	85.97	85.97	85.97	86.47	86.47	86.3	86.3	86.14	86.14	86.3	86.47	84.82	84.32	84.65	84.49	82.67
MF153494.1_GDQY16	87.29	87.62	88.12	88.28	88.28	93.23	95.21	95.05	94.88	94.88	94.39	94.39	99.5	99.5	99.5	99.5	99.67	99.5	-	99.83	99.34	92.08	91.09	83.66	86.14	87.62	87.29	87.13	84.82	86.63	85.15	85.81	85.81	85.81	85.81	85.81	86.3	86.3	86.14	86.14	85.97	85.97	86.14	86.14	84.49	83.99	84.32	84.16	82.34
MF153500.1_GDZQ16	87.46	87.79	88.28	88.45	88.45	93.4	95.38	95.21	95.05	95.05	94.55	94.55	99.67	99.67	99.67	99.67	99.83	99.67	99.83	-	99.5	92.24	91.25	83.83	86.3	87.79	87.46	87.29	84.98	86.8	85.31	85.97	85.97	85.97	85.97	85.97	86.47	86.47	86.3	86.3	86.14	86.14	86.3	86.3	84.65	84.16	84.49	84.32	82.51
MF153495.1_GDSG16	86.96	87.29	87.79	87.95	87.95	92.9	94.88	94.72	94.55	94.55	94.06	94.06	99.17	99.17	99.17	99.17	99.34	99.17	99.34	99.5	-	91.75	90.76	83.33	85.81	87.29	86.96	86.8	84.49	86.3	84.82	85.48	85.48	85.48	85.48	85.48	85.97	85.97	85.81	85.81	85.64	85.64	85.81	85.81	84.16	83.66	83.99	83.83	82.01
KT224385.1_HLJB1	89.44	89.77	89.93	89.27	88.61	92.24	93.89	94.72	94.55	94.55	93.07	93.4	92.24	92.24	92.24	92.24	92.41	92.24	92.08	92.24	91.75	-	91.75	83.66	85.15	86.14	85.31	87.46	86.3	87.13	83.33	84.82	84.82	84.82	84.82	84.82	85.31	85.31	85.48	85.48	85.31	85.31	85.15	86.47	85.48	84.98	84.49	84.32	83.66
AY633973.1_B13	89.44	89.77	90.26	90.59	90.43	91.58	94.22	94.06	93.89	93.89	93.73	94.06	91.25	91.25	91.25	91.25	91.42	91.25	91.09	91.25	90.76	91.75	-	83.66	86.3	87.95	86.8	87.62	86.63	86.96	85.15	85.48	85.48	85.48	85.48	85.48	85.64	85.64	85.81	85.81	85.64	85.64	85.48	85.97	85.64	85.15	84.98	84.82	83.17
MN550991.1_KZ2018	83.33	83.66	83.17	84.32	84.16	84.49	84.65	84.98	85.15	84.82	84.16	84.16	83.99	83.99	83.99	83.99	83.99	83.83	83.66	83.83	83.33	83.66	83.66	-	94.39	90.26	89.6	89.77	89.44	87.46	85.15	84.98	84.98	84.98	84.98	84.98	85.48	85.48	85.31	85.31	85.48	85.48	85.64	83.33	82.18	81.68	81.68	81.52	81.85
MK689121.1_HN1804-1	84.98	85.31	84.82	86.14	86.96	86.96	87.13	87.46	87.29	87.29	86.63	86.63	86.47	86.47	86.47	86.47	86.47	86.3	86.14	86.3	85.81	85.15	86.3	94.39	-	92.9	92.74	92.41	90.59	90.43	88.94	88.12	88.12	88.12	88.12	88.12	88.45	88.45	88.12	88.12	88.28	88.28	88.45	85.81	83.83	83.33	83.5	83.33	82.67
JX187609.1_NVDC-NM1-2011	85.31	85.64	85.48	86.63	86.3	86.8	87.95	88.28	88.12	88.12	87.13	87.46	87.95	87.95	87.95	87.95	87.95	88.12	87.62	87.79	87.29	86.14	87.95	90.26	92.9	-	94.22	92.74	90.59	90.26	90.59	88.28	88.28	88.28	88.28	88.28	88.78	88.78	88.28	88.28	88.45	88.45	88.61	85.64	84.32	83.83	84.16	83.99	82.84
KM196101.1_LNEU12	84.49	84.82	84.65	85.81	86.14	86.8	87.46	87.95	87.79	87.79	86.8	86.96	87.62	87.62	87.62	87.62	87.62	87.79	87.29	87.46	86.96	85.31	86.8	89.6	92.74	94.22	-	91.58	90.92	90.59	90.59	86.8	86.8	86.8	86.8	86.8	87.29	87.29	87.13	87.13	86.96	86.96	87.13	85.48	82.51	82.01	83.17	83	81.68
GU047344.1_BJEU06-1	83.99	84.32	84.65	85.48	85.64	87.95	88.28	89.11	88.94	88.94	87.62	87.95	87.46	87.46	87.46	87.46	87.46	87.62	87.13	87.29	86.8	87.46	87.62	89.77	92.41	92.74	91.58	-	89.93	90.92	89.6	88.12	88.12	88.12	88.12	88.12	88.61	88.61	87.95	87.95	88.12	88.12	88.12	85.81	84.82	84.32	83.99	83.83	82.51
KP860912.1_FJEU13	84.65	84.98	84.49	85.31	84.98	85.81	86.63	86.96	86.8	86.8	85.81	86.14	85.15	85.15	85.15	85.15	85.15	85.15	84.82	84.98	84.49	86.3	86.63	89.44	90.59	90.59	90.92	89.93	-	89.93	86.3	85.81	85.81	85.81	85.81	85.81	86.3	86.3	85.81	85.81	85.97	85.97	85.81	83.83	83.17	82.67	82.18	82.01	81.85
KX967492.1_15HEN1_EU	84.49	84.82	84.82	85.81	86.3	86.96	87.13	87.95	87.79	87.79	86.96	86.96	86.96	86.96	86.96	86.96	86.96	86.96	86.63	86.8	86.3	87.13	86.96	87.46	90.43	90.26	90.59	90.92	89.93	-	86.96	87.62	87.62	87.62	87.62	87.62	87.79	87.79	87.29	87.29	87.13	87.13	86.96	86.3	83.99	83.5	83.99	83.83	82.34
KY363382.1_HENZMD-10	82.18	82.51	82.67	83.5	84.49	84.65	85.15	85.81	85.64	85.64	84.65	84.98	85.48	85.48	85.48	85.48	85.48	85.64	85.15	85.31	84.82	83.33	85.15	85.15	88.94	90.59	90.59	89.6	86.3	86.96	-	86.63	86.63	86.63	86.63	86.63	86.8	86.8	86.96	86.96	86.96	86.96	87.13	83.17	81.85	81.68	83	82.84	81.19
TZJ642	83.99	84.32	84.49	84.49	85.48	85.31	86.14	86.8	86.63	86.63	85.48	85.81	86.14	86.14	86.14	86.14	86.14	85.97	85.81	85.97	85.48	84.82	85.48	84.98	88.12	88.28	86.8	88.12	85.81	87.62	86.63	-	100	100	100	100	98.84	98.84	98.02	98.02	98.18	98.18	98.02	81.85	82.84	82.34	81.52	81.35	79.87
TZJ609	83.99	84.32	84.49	84.49	85.48	85.31	86.14	86.8	86.63	86.63	85.48	85.81	86.14	86.14	86.14	86.14	86.14	85.97	85.81	85.97	85.48	84.82	85.48	84.98	88.12	88.28	86.8	88.12	85.81	87.62	86.63	100	-	100	100	100	98.84	98.84	98.02	98.02	98.18	98.18	98.02	81.85	82.84	82.34	81.52	81.35	79.87
TZJ613	83.99	84.32	84.49	84.49	85.48	85.31	86.14	86.8	86.63	86.63	85.48	85.81	86.14	86.14	86.14	86.14	86.14	85.97	85.81	85.97	85.48	84.82	85.48	84.98	88.12	88.28	86.8	88.12	85.81	87.62	86.63	100	100	-	100	100	98.84	98.84	98.02	98.02	98.18	98.18	98.02	81.85	82.84	82.34	81.52	81.35	79.87
TZJ659	83.99	84.32	84.49	84.49	85.48	85.31	86.14	86.8	86.63	86.63	85.48	85.81	86.14	86.14	86.14	86.14	86.14	85.97	85.81	85.97	85.48	84.82	85.48	84.98	88.12	88.28	86.8	88.12	85.81	87.62	86.63	100	100	100	-	100	98.84	98.84	98.02	98.02	98.18	98.18	98.02	81.85	82.84	82.34	81.52	81.35	79.87
TZJ660	83.99	84.32	84.49	84.49	85.48	85.31	86.14	86.8	86.63	86.63	85.48	85.81	86.14	86.14	86.14	86.14	86.14	85.97	85.81	85.97	85.48	84.82	85.48	84.98	88.12	88.28	86.8	88.12	85.81	87.62	86.63	100	100	100	100	-	98.84	98.84	98.02	98.02	98.18	98.18	98.02	81.85	82.84	82.34	81.52	81.35	79.87
TZJ227	84.49	84.82	84.98	84.98	85.31	85.48	86.63	87.29	87.13	87.13	85.97	86.3	86.63	86.63	86.63	86.63	86.63	86.47	86.3	86.47	85.97	85.31	85.64	85.48	88.45	88.78	87.29	88.61	86.3	87.79	86.8	98.84	98.84	98.84	98.84	98.84	-	100	98.18	98.18	98.35	98.35	98.18	82.34	83	82.67	82.01	81.85	80.36
TZJ657	84.49	84.82	84.98	84.98	85.31	85.48	86.63	87.29	87.13	87.13	85.97	86.3	86.63	86.63	86.63	86.63	86.63	86.47	86.3	86.47	85.97	85.31	85.64	85.48	88.45	88.78	87.29	88.61	86.3	87.79	86.8	98.84	98.84	98.84	98.84	98.84	100	-	98.18	98.18	98.35	98.35	98.18	82.34	83	82.67	82.01	81.85	80.36
TZJ637	84.98	85.31	85.15	85.15	85.81	84.98	86.47	86.8	86.63	86.63	85.64	85.97	86.47	86.47	86.47	86.47	86.47	86.3	86.14	86.3	85.81	85.48	85.81	85.31	88.12	88.28	87.13	87.95	85.81	87.29	86.96	98.02	98.02	98.02	98.02	98.02	98.18	98.18	-	100	99.83	99.83	99.34	82.18	82.84	82.34	81.85	81.68	80.53
TZJ622	84.98	85.31	85.15	85.15	85.81	84.98	86.47	86.8	86.63	86.63	85.64	85.97	86.47	86.47	86.47	86.47	86.47	86.3	86.14	86.3	85.81	85.48	85.81	85.31	88.12	88.28	87.13	87.95	85.81	87.29	86.96	98.02	98.02	98.02	98.02	98.02	98.18	98.18	100	-	99.83	99.83	99.34	82.18	82.84	82.34	81.85	81.68	80.53
TZJ226	84.82	85.15	84.98	84.98	85.64	84.82	86.3	86.63	86.47	86.47	85.48	85.81	86.3	86.3	86.3	86.3	86.3	86.14	85.97	86.14	85.64	85.31	85.64	85.48	88.28	88.45	86.96	88.12	85.97	87.13	86.96	98.18	98.18	98.18	98.18	98.18	98.35	98.35	99.83	99.83	-	100	99.5	82.01	83	82.51	82.01	81.85	80.36
TZJ624	84.82	85.15	84.98	84.98	85.64	84.82	86.3	86.63	86.47	86.47	85.48	85.81	86.3	86.3	86.3	86.3	86.3	86.14	85.97	86.14	85.64	85.31	85.64	85.48	88.28	88.45	86.96	88.12	85.97	87.13	86.96	98.18	98.18	98.18	98.18	98.18	98.35	98.35	99.83	99.83	100	-	99.5	82.01	83	82.51	82.01	81.85	80.36
TZJ234	84.98	85.31	85.15	85.15	85.48	84.65	85.81	86.47	86.3	86.3	85.31	85.64	86.47	86.47	86.47	86.47	86.47	86.3	86.14	86.3	85.81	85.15	85.48	85.64	88.45	88.61	87.13	88.12	85.81	86.96	87.13	98.02	98.02	98.02	98.02	98.02	98.18	98.18	99.34	99.34	99.5	99.5	-	82.18	83.17	82.67	82.18	82.01	80.86
GU047345.1_NMEU09-1	83.66	83.99	85.31	85.81	85.15	86.47	87.29	87.46	87.29	87.62	86.96	86.96	86.47	86.47	86.47	86.47	86.47	86.47	86.14	86.3	85.81	86.47	85.97	83.33	85.81	85.64	85.48	85.81	83.83	86.3	83.17	81.85	81.85	81.85	81.85	81.85	82.34	82.34	82.18	82.18	82.01	82.01	82.18	-	88.12	87.95	89.93	89.77	89.11
MF153486.1_GDFS16	83.5	83.83	83.83	84.32	85.48	84.32	85.81	86.3	86.47	86.47	85.48	85.81	84.82	84.82	84.82	84.82	84.82	84.82	84.49	84.65	84.16	85.48	85.64	82.18	83.83	84.32	82.51	84.82	83.17	83.99	81.85	82.84	82.84	82.84	82.84	82.84	83	83	82.84	82.84	83	83	83.17	88.12	-	99.5	92.9	92.74	91.58
MF153499.1_GDZJ16	83	83.33	83.66	84.16	84.98	83.83	85.31	85.81	85.97	85.97	84.98	85.31	84.32	84.32	84.32	84.32	84.32	84.32	83.99	84.16	83.66	84.98	85.15	81.68	83.33	83.83	82.01	84.32	82.67	83.5	81.68	82.34	82.34	82.34	82.34	82.34	82.67	82.67	82.34	82.34	82.51	82.51	82.67	87.95	99.5	-	92.74	92.57	91.42
MF153489.1_GDHZ16	83.17	83.5	84.16	84.98	85.31	83.83	85.31	85.81	85.97	85.97	85.31	85.31	84.65	84.65	84.65	84.65	84.65	84.65	84.32	84.49	83.99	84.49	84.98	81.68	83.5	84.16	83.17	83.99	82.18	83.99	83	81.52	81.52	81.52	81.52	81.52	82.01	82.01	81.85	81.85	82.01	82.01	82.18	89.93	92.9	92.74	-	99.83	93.07
MF153491.1_GDJY16	83	83.33	83.99	84.82	85.15	83.66	85.15	85.64	85.81	85.81	85.15	85.15	84.49	84.49	84.49	84.49	84.49	84.49	84.16	84.32	83.83	84.32	84.82	81.52	83.33	83.99	83	83.83	82.01	83.83	82.84	81.35	81.35	81.35	81.35	81.35	81.85	81.85	81.68	81.68	81.85	81.85	82.01	89.77	92.74	92.57	99.83	-	92.9
KP860913.1_FJQEU14	81.52	81.85	83.17	83.33	83.33	82.34	83.5	83.99	84.16	84.16	83.17	83.5	82.67	82.67	82.67	82.67	82.67	82.67	82.34	82.51	82.01	83.66	83.17	81.85	82.67	82.84	81.68	82.51	81.85	82.34	81.19	79.87	79.87	79.87	79.87	79.87	80.36	80.36	80.53	80.53	80.36	80.36	80.86	89.11	91.58	91.42	93.07	92.9	-
KC492506.1_NVDC-FJ	84.16	84.49	84.65	85.64	86.47	84.82	85.97	86.47	86.63	86.63	86.3	86.3	84.98	84.98	84.98	84.98	84.98	85.15	84.65	84.82	84.32	85.97	84.98	83	83	84.98	83.66	84.16	81.85	83.17	82.18	81.85	81.85	81.85	81.85	81.85	82.34	82.34	82.18	82.18	82.34	82.34	82.34	89.44	86.63	86.47	88.78	88.61	87.46
KC492505.1_NVDC-NM3	84.32	84.65	84.49	85.48	86.3	84.65	85.81	86.3	86.47	86.47	86.14	86.14	84.82	84.82	84.82	84.82	84.82	84.98	84.49	84.65	84.16	85.81	84.82	83.17	83.17	84.82	83.5	83.99	81.68	83	82.34	82.01	82.01	82.01	82.01	82.01	82.51	82.51	82.34	82.34	82.51	82.51	82.51	89.27	86.8	86.63	88.94	88.78	87.29
KC492504.1_NVDC-NM2	84.32	84.65	84.49	85.48	86.3	84.65	85.81	86.3	86.47	86.47	86.14	86.14	84.82	84.82	84.82	84.82	84.82	84.98	84.49	84.65	84.16	85.81	84.82	83.17	83.17	84.82	83.5	83.99	81.68	83	82.34	82.01	82.01	82.01	82.01	82.01	82.51	82.51	82.34	82.34	82.51	82.51	82.51	89.27	86.8	86.63	88.94	88.78	87.29
MF153488.1_GDHY16	85.81	86.14	85.31	85.97	84.98	84.98	86.3	86.8	86.63	86.63	86.3	86.3	84.98	84.98	84.98	84.98	84.98	84.82	84.65	84.82	84.32	85.31	86.14	81.35	83.83	82.67	82.18	82.67	82.01	82.67	82.18	82.67	82.67	82.67	82.67	82.67	82.84	82.84	83.33	83.33	83.17	83.17	83	82.51	82.51	82.01	82.51	82.34	81.35
MF153493.1_GDMZ16	86.14	86.47	85.64	85.97	84.82	84.49	85.81	86.3	86.14	86.14	85.81	85.81	84.82	84.82	84.82	84.82	84.82	84.65	84.49	84.65	84.16	85.64	85.81	80.69	83.33	82.18	81.68	81.85	81.52	82.34	81.35	82.34	82.34	82.34	82.34	82.34	82.51	82.51	83	83	82.84	82.84	82.67	82.67	82.34	81.85	82.51	82.34	81.35
a：Identity = A/(A+B). A:the counts of same site in alignment locus; B: the counts of different site in alignment locus.
[truncated: 5 more columns]
